# Supplementary material
Source: publisher figshare collection journal article supplement (https://karger.figshare.com/articles/dataset/_/28303031)
Supplement: Supplementary file 1 [file 1]

**Supplementary Table 2: Table summarizing the 30 articles screened and the 8 shortlisted ones that were considered the highest in methodological quality based on their scores in the "Scope and Purpose" and "Rigour of Development" domains of the AGREE II assessment.66**

| # | Article | Year | Category | Shortlisted |
| --- | --- | --- | --- | --- |
| 1 | Middle-East: CMPA92 | 2019 | Guideline | No |
| 2 | NIAID: Peanut Allergy93 | 2017 | Guideline | Yes |
| 3 | AAAAI: Nutritional Interventions (High-risk)94 | 2013 | Guideline | No |
| 4 | WAO: Probiotics95 | 2015 | Guideline | Yes |
| 5 | APAPARI: Food Allergy69 | 2018 | Guideline | No |
| 6 | WAO: Vitamin D96 | 2016 | Guideline | Yes |
| 7 | Philippines: Allergic Diseases97 | 2017 | Guideline | No |
| 8 | WAO: Prebiotics98 | 2016 | Guideline | Yes |
| 9 | CSACI: Peanut Allergy99 | 2017 | Guideline | No |
| 10 | Italy: Food & Airway Allergies100 | 2016 | Guideline | No |
| 11 | NAS: Food Allergy101 | 2016 | Guideline | Yes |
| 12 | German S3: Allergic Diseases68 | 2022 | Guideline | Yes |
| 13 | EAACI: Food Allergy67 | 2021 | Guideline | Yes |
| 14 | Japanese: Food Allergy78 | 2020 | Guideline | No |
| 15 | HK: Allergic Diseases102 | 2016 | Guideline | No |
| 16 | US/Canada: Food Allergy66 | 2021 | Guideline | Yes |
| 17 | International: Peanut Allergy103 | 2015 | Guideline | No |
| 18 | Singapore: Allergic Diseases104 | 2019 | Guideline | No |
| 19 | HK: Peanut Allergy (High-risk)105 | 2015 | Guideline | No |
| 20 | Malaysia: Allergic Diseases106 | 2014 | Guideline | No |
| 21 | ASCIA: Food Allergy107 | 2020 | Guideline | No |
| 22 | CSACI: Peanut Allergy (High-risk)108 | 2014 | Guideline | No |
| 23 | AAP: Atopic Dermatitis109 | 2019 | Guideline | No |
| 24 | BSACI: Food Allergy110 | 2018 | Guideline | No |
| 25 | Russia: Food Allergy111 | 2018 | Guideline | No |
| 26 | Russia: Atopic Dermatitis112 | 2021 | Guideline | No |
| 27 | Netherlands: Food Allergy113 | 2010 | Guideline | No |
| 28 | Finnish: Food Allergy114 | 2019 | Guideline | No |
| 29 | Thailand: Atopic Dermatitis115 | 2016 | Guideline | No |
| 30 | Thailand: Food Allergy116 | 2020 | Guideline | No |
